# Supplementary material
Source: publisher site journal article supplement (https://www.dovepress.com/article/270509)
Supplement: Supplementary file 1 [file get_supplementary_file.php]

# Supplemental Material

**Genetic liability to smoking and breast cancer risk**

Zhouming Xu1, Hongxia Xu1, Yunlong Lu2

1Huzhou Maternal and Child Health Care Hospital, Huzhou 313000, Zhejiang, China; 2Department of Cardiology, The First Affiliated Hospital, School of Medicine, Zhejiang University, Hangzhou 310003, Zhejiang, China

**Contents**

[Supplemental Material 1](#_Toc49672598)

[Supplementary Table 1. Characteristics of the genetic variants associated with smoking initiation 2](#_Toc49672599)

[Supplementary Table 2. Characteristics of the genetic variants associated with lifetime smoking index 17](#_Toc49672600)

[Supplementary Table 3. Mendelian randomization associations of genetically predicted smoking with overall, ER-positive, and ER-negative breast cancer 23](#_Toc49672601)

# Supplementary Table 1. Characteristics of the genetic variants associated with smoking initiation

| **SNP** | **EA** | **NA** | **EAF** | **Chr** | **Position** | **Gene** | **Beta*** | **Se** | **P-value** | **F** |
| --- | --- | --- | --- | --- | --- | --- | --- | --- | --- | --- |
| rs12130857 | G | A | 0.32 | 1 | 7791461 | Intron:CAMTA1 | -0.018 | 0.003 | 3.7E-11 | 43.8 |
| rs301807 | A | G | 0.57 | 1 | 8484823 | Intron:LOC102724552|RERE | 0.018 | 0.003 | 2.5E-12 | 49.0 |
| rs3820277 | G | T | 0.53 | 1 | 18436657 | Intron:IGSF21 | -0.019 | 0.003 | 1.6E-13 | 54.5 |
| rs1889571 | T | G | 0.13 | 1 | 32195819 | Intron:ADGRB2 | 0.022 | 0.004 | 4.2E-09 | 34.5 |
| rs10914684 | G | A | 0.32 | 1 | 33795572 | Intron:PHC2 | -0.016 | 0.003 | 6.3E-09 | 33.7 |
| rs2637869 | G | A | 0.30 | 1 | 38757237 | Intergenic | 0.018 | 0.003 | 6.5E-11 | 42.7 |
| rs12755632 | A | G | 0.32 | 1 | 41776623 | Intergenic | -0.015 | 0.003 | 1.9E-08 | 31.6 |
| rs951740 | G | A | 0.63 | 1 | 44011737 | Intron:PTPRF | 0.030 | 0.003 | 3.8E-29 | 126.0 |
| rs925524 | A | G | 0.71 | 1 | 46496709 | Synonymous:MAST2 | 0.016 | 0.003 | 2.9E-08 | 30.7 |
| rs12022778 | A | C | 0.20 | 1 | 50603995 | Intron:ELAVL4 | 0.027 | 0.003 | 3.2E-17 | 71.2 |
| rs11587399 | A | T | 0.22 | 1 | 50861071 | Intergenic | -0.018 | 0.003 | 7.3E-09 | 33.5 |
| rs4912332 | C | T | 0.49 | 1 | 58815243 | Intergenic | 0.014 | 0.003 | 2.9E-08 | 30.7 |
| rs1937443 | C | G | 0.56 | 1 | 66469643 | Intron:PDE4B | 0.020 | 0.003 | 1.8E-15 | 63.3 |
| rs1022528 | G | A | 0.34 | 1 | 71490122 | Intron:PTGER3 | 0.017 | 0.003 | 8.5E-11 | 42.1 |
| rs12740789 | G | A | 0.18 | 1 | 72752073 | Intergenic | -0.028 | 0.003 | 1.2E-17 | 73.2 |
| rs80054503 | T | C | 0.12 | 1 | 72900406 | Intergenic | -0.024 | 0.004 | 3.1E-09 | 35.1 |
| rs10789369 | A | G | 0.62 | 1 | 73824909 | Intergenic | -0.023 | 0.003 | 3.4E-19 | 80.2 |
| rs1514176 | G | A | 0.58 | 1 | 74991596 | Intron:FPGT-TNNI3K|TNNI3K | -0.019 | 0.003 | 7.7E-14 | 55.9 |
| rs10873871 | A | G | 0.21 | 1 | 76689019 | Intron:ST6GALNAC3 | 0.017 | 0.003 | 2.8E-08 | 30.8 |
| rs11162019 | C | T | 0.36 | 1 | 87913176 | Intergenic | -0.015 | 0.003 | 5.1E-09 | 34.2 |
| rs1008078 | C | T | 0.40 | 1 | 91189731 | Intergenic | 0.023 | 0.003 | 1.6E-18 | 77.1 |
| rs1935571 | T | G | 0.48 | 1 | 96414335 | Intergenic | -0.016 | 0.003 | 7.0E-10 | 38.0 |
| rs12027999 | T | C | 0.12 | 1 | 154206358 | Intron:UBAP2L | -0.024 | 0.004 | 5.3E-10 | 38.6 |
| rs45444697 | C | G | 0.21 | 1 | 155034632 | Intron:ADAM15|DCST1-AS1 | 0.020 | 0.003 | 2.7E-10 | 39.9 |
| rs2901785 | G | A | 0.45 | 1 | 174104743 | Intron:LOC102724601 | -0.017 | 0.003 | 1.5E-11 | 45.6 |
| rs147052174 | G | T | 0.02 | 1 | 179783167 | Nonsynonymous:FAM163A | 0.062 | 0.010 | 2.3E-10 | 40.2 |
| rs35656245 | G | A | 0.28 | 1 | 190957480 | Intergenic | 0.016 | 0.003 | 2.2E-08 | 31.3 |
| rs12739243 | T | C | 0.22 | 1 | 210302043 | Intron:SYT14 | -0.021 | 0.003 | 4.5E-12 | 47.9 |
| rs12563365 | G | A | 0.56 | 1 | 236872829 | Intron:ACTN2 | 0.017 | 0.003 | 1.1E-10 | 41.7 |
| rs876793 | T | C | 0.35 | 1 | 237852083 | Intron:RYR2 | -0.018 | 0.003 | 5.7E-11 | 42.9 |
| rs114976176 | A | C | 0.35 | 2 | 264621 | Intron:SH3YL1 | -0.016 | 0.003 | 6.0E-09 | 33.8 |
| rs62106258 | T | C | 0.05 | 2 | 417167 | Intergenic | -0.045 | 0.006 | 3.3E-14 | 57.5 |
| rs6731872 | T | G | 0.83 | 2 | 624205 | Intergenic | 0.032 | 0.003 | 5.4E-21 | 88.4 |
| rs1022376 | T | C | 0.52 | 2 | 22067213 | Intergenic | -0.015 | 0.003 | 1.7E-08 | 31.9 |
| rs61533748 | T | C | 0.38 | 2 | 22582968 | Intergenic | 0.017 | 0.003 | 2.8E-11 | 44.3 |
| rs72790288 | G | A | 0.03 | 2 | 29513404 | Intron:ALK | -0.046 | 0.008 | 3.3E-09 | 35.0 |
| rs2710634 | T | C | 0.52 | 2 | 32808804 | Intron:BIRC6 | -0.018 | 0.003 | 3.4E-12 | 48.5 |
| rs62137126 | A | G | 0.12 | 2 | 44250149 | Intergenic | -0.024 | 0.004 | 1.3E-09 | 36.8 |
| rs1004787 | G | A | 0.55 | 2 | 45159091 | Intron:LINC01833 | 0.028 | 0.003 | 1.1E-28 | 123.0 |
| rs7598402 | C | G | 0.49 | 2 | 50735943 | Intron:NRXN1 | -0.015 | 0.003 | 7.4E-09 | 33.4 |
| rs10490159 | C | T | 0.39 | 2 | 51341259 | Intron:LOC730100 | 0.017 | 0.003 | 3.9E-11 | 43.7 |
| rs1518393 | A | C | 0.62 | 2 | 58171220 | Intron:VRK2 | 0.017 | 0.003 | 1.3E-10 | 41.3 |
| rs17616642 | A | G | 0.25 | 2 | 59022210 | Intron:LINC01122 | -0.017 | 0.003 | 2.1E-08 | 31.4 |
| rs6730325 | G | A | 0.61 | 2 | 59315828 | Intergenic | -0.015 | 0.003 | 2.1E-08 | 31.4 |
| rs2539706 | G | A | 0.53 | 2 | 59819545 | Intergenic | 0.016 | 0.003 | 2.0E-10 | 40.5 |
| rs7585579 | C | G | 0.50 | 2 | 60024857 | Intergenic | 0.020 | 0.003 | 5.5E-15 | 61.1 |
| rs1863161 | G | A | 0.56 | 2 | 60139524 | Intergenic | 0.015 | 0.003 | 2.3E-09 | 35.7 |
| rs359247 | A | T | 0.64 | 2 | 60477052 | Intergenic | 0.022 | 0.003 | 9.9E-17 | 69.0 |
| rs62180324 | G | A | 0.21 | 2 | 63416606 | Intron:WDPCP | -0.020 | 0.003 | 3.9E-10 | 39.2 |
| rs6750107 | G | A | 0.39 | 2 | 80748807 | Intron:CTNNA2 | 0.015 | 0.003 | 2.6E-08 | 31.0 |
| rs12714017 | T | C | 0.51 | 2 | 80999398 | Intergenic | 0.015 | 0.003 | 3.7E-09 | 34.8 |
| rs56208390 | A | G | 0.12 | 2 | 83247997 | Intergenic | 0.022 | 0.004 | 2.7E-08 | 30.9 |
| rs11692435 | G | A | 0.08 | 2 | 98275354 | Nonsynonymous:ACTR1B | 0.025 | 0.005 | 4.5E-08 | 29.9 |
| rs13392222 | A | C | 0.14 | 2 | 100672408 | Intron:AFF3 | -0.023 | 0.004 | 1.9E-10 | 40.5 |
| rs1901477 | A | G | 0.51 | 2 | 104126983 | Intergenic | 0.030 | 0.003 | 2.1E-31 | 136.0 |
| rs11889814 | A | C | 0.13 | 2 | 104432494 | Intergenic | -0.021 | 0.004 | 3.4E-08 | 30.4 |
| rs3811038 | T | C | 0.28 | 2 | 113240183 | Intron:TTL | 0.019 | 0.003 | 1.6E-11 | 45.4 |
| rs75210106 | C | T | 0.18 | 2 | 113246436 | Intron:TTL | -0.019 | 0.003 | 2.3E-08 | 31.2 |
| rs34399632 | A | G | 0.23 | 2 | 137571174 | Intron:THSD7B | 0.019 | 0.003 | 1.5E-10 | 41.1 |
| rs74697736 | G | A | 0.29 | 2 | 145412271 | Intergenic | 0.022 | 0.003 | 2.4E-15 | 62.7 |
| rs6756212 | C | T | 0.54 | 2 | 146140132 | Intergenic | -0.034 | 0.003 | 3.5E-40 | 176.0 |
| rs3076896 | G | A | 0.39 | 2 | 146283610 | Intergenic | 0.023 | 0.003 | 2.0E-16 | 67.6 |
| rs16826827 | T | C | 0.12 | 2 | 147825689 | Intergenic | -0.022 | 0.004 | 9.2E-09 | 33.0 |
| rs1445649 | T | C | 0.54 | 2 | 155682556 | Intron:KCNJ3 | 0.021 | 0.003 | 8.5E-16 | 64.8 |
| rs1722666 | C | T | 0.73 | 2 | 161816880 | Intergenic | 0.016 | 0.003 | 2.2E-08 | 31.3 |
| rs11678980 | G | A | 0.45 | 2 | 162101261 | Exon:LINC01806 | 0.018 | 0.003 | 5.2E-12 | 47.6 |
| rs12474587 | G | T | 0.43 | 2 | 162802993 | Intron:SLC4A10 | 0.024 | 0.003 | 4.8E-21 | 88.6 |
| rs357304 | T | C | 0.73 | 2 | 164862639 | Intergenic | 0.017 | 0.003 | 5.4E-09 | 34.0 |
| rs13007361 | G | A | 0.21 | 2 | 166250244 | Intergenic | 0.018 | 0.003 | 2.3E-08 | 31.2 |
| rs7600835 | G | A | 0.34 | 2 | 172521827 | Intergenic | -0.015 | 0.003 | 1.8E-08 | 31.7 |
| rs6750529 | C | T | 0.74 | 2 | 182027603 | Intron:LINC01934 | 0.020 | 0.003 | 9.3E-12 | 46.5 |
| rs17229285 | C | T | 0.51 | 2 | 199523122 | Intergenic | -0.015 | 0.003 | 1.3E-09 | 36.9 |
| rs3115418 | T | C | 0.45 | 2 | 200936399 | Intergenic | -0.014 | 0.003 | 2.8E-08 | 30.9 |
| rs62193862 | G | A | 0.10 | 2 | 202843875 | Intergenic | 0.024 | 0.004 | 2.0E-08 | 31.5 |
| rs4674916 | C | A | 0.33 | 2 | 225365635 | Intron:CUL3 | -0.018 | 0.003 | 3.1E-11 | 44.1 |
| rs4674993 | A | G | 0.20 | 2 | 226332033 | Intron:NYAP2 | -0.024 | 0.003 | 4.9E-14 | 56.8 |
| rs11713899 | A | C | 0.17 | 3 | 2365026 | Intron:CNTN4 | 0.019 | 0.003 | 3.2E-08 | 30.6 |
| rs748832 | A | G | 0.37 | 3 | 16851202 | Intergenic | 0.017 | 0.003 | 6.6E-11 | 42.6 |
| rs10446419 | A | G | 0.21 | 3 | 25725501 | Intergenic | -0.020 | 0.003 | 5.1E-10 | 38.7 |
| rs13319205 | T | A | 0.29 | 3 | 47800216 | Intron:SMARCC1 | 0.017 | 0.003 | 3.8E-09 | 34.7 |
| rs3172494 | G | T | 0.12 | 3 | 48731487 | Utr3:IP6K2 | -0.029 | 0.004 | 3.4E-13 | 53.0 |
| rs2526390 | C | T | 0.33 | 3 | 50192760 | Intron:SEMA3F|SEMA3F-AS1 | 0.020 | 0.003 | 3.6E-14 | 57.4 |
| rs2276825 | T | C | 0.25 | 3 | 52886605 | Intron: TMEM110-MUSTN1 | 0.019 | 0.003 | 1.9E-10 | 40.6 |
| rs2306866 | A | T | 0.61 | 3 | 53766212 | Intron:CACNA1D | -0.017 | 0.003 | 1.9E-10 | 40.6 |
| rs73831818 | A | G | 0.06 | 3 | 55988394 | Intron:ERC2 | 0.032 | 0.005 | 5.5E-09 | 34.0 |
| rs1910236 | G | A | 0.47 | 3 | 59434420 | Intergenic | 0.015 | 0.003 | 9.9E-09 | 32.9 |
| rs7640107 | C | T | 0.43 | 3 | 59966156 | Intron:FHIT | -0.014 | 0.003 | 3.5E-08 | 30.4 |
| rs2734390 | A | G | 0.37 | 3 | 60459291 | Intron:FHIT | 0.015 | 0.003 | 2.1E-08 | 31.4 |
| rs221988 | A | C | 0.38 | 3 | 64234307 | Intergenic | -0.015 | 0.003 | 1.4E-08 | 32.2 |
| rs2196356 | G | C | 0.29 | 3 | 70890288 | Intergenic | -0.019 | 0.003 | 2.5E-11 | 44.6 |
| rs11128203 | T | A | 0.53 | 3 | 71064431 | Intron:FOXP1 | 0.020 | 0.003 | 1.3E-15 | 63.9 |
| rs62246017 | G | A | 0.32 | 3 | 71483084 | Intron:FOXP1 | -0.016 | 0.003 | 3.0E-09 | 35.2 |
| rs4543050 | A | T | 0.82 | 3 | 74954560 | Intergenic | 0.022 | 0.003 | 1.5E-11 | 45.6 |
| rs6782116 | C | T | 0.42 | 3 | 77176032 | Intron:ROBO2 | -0.015 | 0.003 | 1.5E-08 | 32.1 |
| rs13066050 | C | T | 0.21 | 3 | 81325861 | Intergenic | 0.019 | 0.003 | 1.9E-09 | 36.0 |
| rs12633090 | G | C | 0.18 | 3 | 83241365 | Intergenic | -0.023 | 0.003 | 3.2E-12 | 48.6 |
| rs1549979 | C | T | 0.62 | 3 | 85460131 | Intron:CADM2 | -0.025 | 0.003 | 8.8E-21 | 87.4 |
| rs74664784 | T | C | 0.38 | 3 | 85475292 | Intron:CADM2 | -0.020 | 0.003 | 9.3E-13 | 51.0 |
| rs57153235 | T | G | 0.32 | 3 | 85902536 | Intron:CADM2 | -0.019 | 0.003 | 1.6E-12 | 50.0 |
| rs6437769 | C | T | 0.58 | 3 | 107997514 | Intergenic | 0.014 | 0.003 | 3.7E-08 | 30.3 |
| rs9288999 | G | A | 0.74 | 3 | 114147927 | Intron:ZBTB20 | 0.017 | 0.003 | 1.5E-09 | 36.5 |
| rs6438436 | C | T | 0.82 | 3 | 117822149 | Intergenic | 0.025 | 0.003 | 5.3E-14 | 56.6 |
| rs12053870 | T | G | 0.54 | 3 | 118302515 | Intron:LOC105374060 | 0.016 | 0.003 | 1.0E-09 | 37.3 |
| rs9826984 | G | A | 0.54 | 3 | 131945722 | Intergenic | -0.014 | 0.003 | 3.9E-08 | 30.2 |
| rs2279829 | C | T | 0.22 | 3 | 147106319 | Utr3:ZIC4 | -0.017 | 0.003 | 2.1E-08 | 31.5 |
| rs2319545 | C | A | 0.15 | 3 | 147719648 | Intergenic | 0.023 | 0.004 | 8.3E-11 | 42.2 |
| rs10935779 | C | T | 0.42 | 3 | 149543102 | Intron:RNF13 | -0.014 | 0.003 | 3.0E-08 | 30.7 |
| rs963354 | C | A | 0.69 | 3 | 157393770 | Intergenic | 0.015 | 0.003 | 4.2E-08 | 30.0 |
| rs1714521 | A | C | 0.41 | 3 | 158284861 | Intron:LOC100996447 | -0.016 | 0.003 | 3.1E-10 | 39.6 |
| rs1449012 | C | T | 0.46 | 3 | 159048333 | Intron:IQCJ-SCHIP1|SCHIP1 | -0.015 | 0.003 | 1.8E-09 | 36.2 |
| rs9850597 | G | A | 0.82 | 3 | 161761866 | Intergenic | -0.019 | 0.003 | 1.7E-08 | 31.9 |
| rs1187820 | C | T | 0.44 | 3 | 173072584 | Intergenic | -0.014 | 0.003 | 2.7E-08 | 30.9 |
| rs16828799 | G | T | 0.16 | 3 | 173353739 | Intron:NLGN1 | 0.020 | 0.004 | 1.8E-08 | 31.7 |
| rs9841807 | C | T | 0.27 | 3 | 175718927 | Intergenic | 0.016 | 0.003 | 1.4E-08 | 32.3 |
| rs7631379 | T | C | 0.21 | 3 | 181409057 | Intron:SOX2-OT | 0.021 | 0.003 | 3.9E-11 | 43.6 |
| rs4140932 | T | A | 0.43 | 4 | 15458598 | Intergenic | -0.014 | 0.003 | 4.9E-08 | 29.8 |
| rs12642744 | G | T | 0.74 | 4 | 28027176 | Intergenic | -0.017 | 0.003 | 2.8E-08 | 30.8 |
| rs59537158 | C | T | 0.21 | 4 | 28246049 | Intergenic | 0.022 | 0.003 | 4.6E-13 | 52.4 |
| rs1389171 | T | A | 0.24 | 4 | 28822284 | Intergenic | -0.017 | 0.003 | 4.5E-09 | 34.4 |
| rs55944129 | T | C | 0.27 | 4 | 29082156 | Intergenic | -0.018 | 0.003 | 1.1E-09 | 37.2 |
| rs58400863 | G | A | 0.35 | 4 | 31184484 | Intron:LINC02497 | -0.020 | 0.003 | 4.9E-14 | 56.8 |
| rs7657022 | A | G | 0.49 | 4 | 35501032 | Intergenic | 0.018 | 0.003 | 7.3E-13 | 51.5 |
| rs55900829 | A | T | 0.33 | 4 | 35514712 | Intergenic | 0.019 | 0.003 | 5.6E-12 | 47.5 |
| rs112725451 | C | T | 0.17 | 4 | 68017710 | Intergenic | 0.026 | 0.003 | 1.7E-14 | 58.9 |
| rs1160685 | C | G | 0.45 | 4 | 94052854 | Intron:GRID2 | 0.015 | 0.003 | 2.3E-09 | 35.7 |
| rs1435479 | G | T | 0.29 | 4 | 94550450 | Intron:GRID2 | 0.016 | 0.003 | 5.7E-09 | 33.9 |
| rs3934797 | G | A | 0.18 | 4 | 112467612 | Intergenic | -0.021 | 0.003 | 1.1E-10 | 41.6 |
| rs71602617 | C | T | 0.22 | 4 | 136406155 | Intergenic | -0.018 | 0.003 | 2.1E-08 | 31.4 |
| rs7696257 | G | A | 0.37 | 4 | 137474783 | Intergenic | 0.015 | 0.003 | 6.8E-09 | 33.6 |
| rs13109980 | G | A | 0.33 | 4 | 140886963 | Intron:MAML3 | -0.022 | 0.003 | 3.4E-16 | 66.6 |
| rs1116690 | A | G | 0.74 | 4 | 143510148 | Intron:INPP4B | 0.016 | 0.003 | 2.2E-08 | 31.3 |
| rs13110073 | T | C | 0.40 | 4 | 147797913 | Intron:TTC29 | -0.025 | 0.003 | 3.2E-21 | 89.4 |
| rs28717373 | C | T | 0.36 | 4 | 147985231 | Intergenic | -0.016 | 0.003 | 6.2E-10 | 38.3 |
| rs62340589 | G | C | 0.20 | 4 | 176875795 | Intron:GPM6A | 0.017 | 0.003 | 4.3E-08 | 30.0 |
| rs12517438 | T | G | 0.54 | 5 | 30842054 | Intergenic | 0.015 | 0.003 | 1.9E-09 | 36.1 |
| rs35375873 | G | C | 0.11 | 5 | 43190647 | Intergenic | -0.027 | 0.004 | 3.3E-11 | 44.0 |
| rs986714 | A | T | 0.45 | 5 | 50821338 | Intergenic | -0.016 | 0.003 | 4.1E-10 | 39.1 |
| rs71592686 | T | C | 0.27 | 5 | 60121271 | Intron:ELOVL7 | 0.021 | 0.003 | 3.9E-13 | 52.7 |
| rs2028269 | G | A | 0.40 | 5 | 79308315 | Intron:THBS4 | 0.016 | 0.003 | 5.2E-10 | 38.6 |
| rs6874731 | T | G | 0.48 | 5 | 80263865 | Intron:RASGRF2 | 0.015 | 0.003 | 1.8E-09 | 36.1 |
| rs6452785 | C | T | 0.47 | 5 | 87685500 | Intron:TMEM161B-AS1 | -0.027 | 0.003 | 4.7E-26 | 111.0 |
| rs10805858 | A | T | 0.34 | 5 | 88873832 | Intergenic | 0.018 | 0.003 | 1.9E-11 | 45.1 |
| rs181508347 | T | G | 0.01 | 5 | 91366274 | Intergenic | 0.081 | 0.013 | 5.0E-10 | 38.7 |
| rs42417 | C | T | 0.69 | 5 | 94198290 | Intron:MCTP1 | 0.017 | 0.003 | 8.3E-10 | 37.7 |
| rs72780746 | T | C | 0.17 | 5 | 103929588 | Intergenic | -0.026 | 0.003 | 2.1E-14 | 58.5 |
| rs10060196 | C | A | 0.58 | 5 | 106455988 | Intergenic | 0.018 | 0.003 | 1.3E-12 | 50.3 |
| rs72789626 | T | A | 0.14 | 5 | 106825618 | Intron:EFNA5 | -0.026 | 0.004 | 5.1E-12 | 47.6 |
| rs17165769 | A | G | 0.39 | 5 | 107365642 | Intron:FBXL17 | 0.016 | 0.003 | 9.6E-10 | 37.4 |
| rs329124 | A | G | 0.43 | 5 | 133865452 | Intron:JADE2 | -0.016 | 0.003 | 2.0E-10 | 40.5 |
| rs1385108 | C | T | 0.24 | 5 | 154839646 | Intergenic | 0.019 | 0.003 | 3.8E-10 | 39.2 |
| rs1173461 | C | T | 0.33 | 5 | 157707571 | Intergenic | 0.017 | 0.003 | 9.5E-10 | 37.4 |
| rs11956866 | T | G | 0.57 | 5 | 161018271 | Intergenic | -0.015 | 0.003 | 7.8E-09 | 33.3 |
| rs3909281 | T | G | 0.54 | 5 | 165096435 | Intergenic | 0.021 | 0.003 | 1.6E-16 | 68.0 |
| rs3843905 | C | T | 0.40 | 5 | 165427280 | Intergenic | -0.015 | 0.003 | 5.4E-09 | 34.0 |
| rs79476395 | A | G | 0.07 | 5 | 166063680 | Intergenic | 0.033 | 0.005 | 1.0E-11 | 46.2 |
| rs6890961 | C | T | 0.62 | 5 | 166778503 | Intron:TENM2 | -0.019 | 0.003 | 2.1E-13 | 53.9 |
| rs4044321 | A | G | 0.64 | 5 | 166989513 | Intron:TENM2 | -0.023 | 0.003 | 1.8E-17 | 72.4 |
| rs2173019 | T | A | 0.18 | 5 | 167614971 | Intron:TENM2 | 0.028 | 0.003 | 3.0E-17 | 71.4 |
| rs10042827 | T | C | 0.68 | 5 | 170299916 | Intron:RANBP17 | 0.017 | 0.003 | 9.4E-10 | 37.4 |
| rs359431 | C | T | 0.56 | 5 | 173288534 | Intergenic | -0.014 | 0.003 | 3.2E-08 | 30.6 |
| rs1059490 | T | C | 0.37 | 6 | 26171250 | Utr3:HIST1H2BD | -0.019 | 0.003 | 2.2E-12 | 49.3 |
| rs6932350 | T | A | 0.45 | 6 | 26571629 | Intron:LOC105374988 | 0.015 | 0.003 | 5.1E-09 | 34.1 |
| rs1150668 | T | G | 0.42 | 6 | 28129789 | Intron:ZNF192P1 | -0.019 | 0.003 | 8.5E-13 | 51.2 |
| rs1632941 | T | C | 0.46 | 6 | 29796685 | Intron:HLA-G | -0.016 | 0.003 | 6.7E-10 | 38.1 |
| rs3218116 | C | T | 0.26 | 6 | 41901763 | Intergenic | -0.020 | 0.003 | 1.1E-11 | 46.2 |
| rs160631 | T | G | 0.73 | 6 | 52895230 | Intron:ICK | -0.017 | 0.003 | 1.9E-09 | 36.1 |
| rs7743165 | T | G | 0.50 | 6 | 67521222 | Intergenic | 0.019 | 0.003 | 4.2E-14 | 57.1 |
| rs79180767 | C | T | 0.25 | 6 | 67540984 | Intergenic | 0.020 | 0.003 | 7.0E-12 | 47.0 |
| rs10945141 | G | A | 0.26 | 6 | 69470709 | Intron:ADGRB3 | 0.018 | 0.003 | 3.6E-10 | 39.3 |
| rs17554906 | G | C | 0.44 | 6 | 92226609 | Intergenic | 0.014 | 0.003 | 3.1E-08 | 30.6 |
| rs619087 | A | G | 0.42 | 6 | 94175279 | Intergenic | 0.014 | 0.003 | 3.1E-08 | 30.6 |
| rs6568832 | G | A | 0.75 | 6 | 97702876 | Intron:MIR548H3|MMS22L | 0.019 | 0.003 | 1.7E-10 | 40.7 |
| rs12195240 | G | A | 0.29 | 6 | 98636905 | Intergenic | 0.025 | 0.003 | 1.1E-18 | 77.9 |
| rs6936160 | C | T | 0.70 | 6 | 100347745 | Intergenic | 0.020 | 0.003 | 4.2E-13 | 52.5 |
| rs12530388 | A | C | 0.51 | 6 | 101329173 | Utr5:ASCC3 | -0.018 | 0.003 | 5.8E-13 | 51.9 |
| rs3800227 | A | G | 0.74 | 6 | 108994161 | Intron:FOXO3 | 0.017 | 0.003 | 3.6E-09 | 34.8 |
| rs118202 | G | T | 0.81 | 6 | 111658371 | Intron:REV3L | -0.037 | 0.003 | 1.9E-29 | 127.0 |
| rs73008357 | A | C | 0.12 | 6 | 156431856 | Intergenic | -0.022 | 0.004 | 2.4E-08 | 31.1 |
| rs9331343 | T | C | 0.57 | 6 | 157738258 | Intron:TMEM242 | -0.014 | 0.003 | 3.9E-08 | 30.2 |
| rs10698713 | G | A | 0.05 | 6 | 158882320 | Intron:TULP4 | -0.034 | 0.006 | 2.4E-09 | 35.6 |
| rs1737329 | C | G | 0.74 | 6 | 163807748 | Intergenic | 0.017 | 0.003 | 5.1E-09 | 34.2 |
| rs10272990 | T | C | 0.33 | 7 | 1703675 | Intergenic | -0.021 | 0.003 | 1.3E-14 | 59.4 |
| rs6948707 | T | G | 0.42 | 7 | 1870794 | Intron:MAD1L1 | 0.024 | 0.003 | 4.2E-21 | 88.9 |
| rs10259715 | T | A | 0.21 | 7 | 3329967 | Intergenic | -0.019 | 0.003 | 6.4E-09 | 33.7 |
| rs13237637 | G | C | 0.49 | 7 | 3503207 | Intron:SDK1 | -0.024 | 0.003 | 1.5E-20 | 86.3 |
| rs79631993 | A | C | 0.22 | 7 | 69432311 | Intron:AUTS2 | -0.017 | 0.003 | 3.7E-08 | 30.3 |
| rs7809303 | G | A | 0.33 | 7 | 69484366 | Intron:AUTS2 | -0.021 | 0.003 | 3.5E-15 | 62.0 |
| rs7802996 | C | T | 0.17 | 7 | 77771983 | Intron:MAGI2 | -0.021 | 0.003 | 1.1E-09 | 37.2 |
| rs1030015 | G | T | 0.52 | 7 | 78139581 | Intron:MAGI2 | 0.014 | 0.003 | 2.2E-08 | 31.4 |
| rs4727189 | T | C | 0.34 | 7 | 88442568 | Intron:ZNF804B | 0.015 | 0.003 | 3.0E-08 | 30.7 |
| rs76841737 | C | G | 0.10 | 7 | 91281409 | Intergenic | -0.023 | 0.004 | 3.3E-08 | 30.5 |
| rs11768481 | C | A | 0.34 | 7 | 96629103 | Intron:DLX6-AS1 | -0.019 | 0.003 | 5.2E-12 | 47.6 |
| rs1799068 | G | T | 0.38 | 7 | 97707069 | Intergenic | 0.017 | 0.003 | 2.6E-10 | 40.0 |
| rs13437771 | A | G | 0.16 | 7 | 99071478 | Intron:ZNF789 | -0.027 | 0.004 | 1.4E-14 | 59.3 |
| rs11766326 | T | C | 0.51 | 7 | 111100585 | Intron:IMMP2L | -0.018 | 0.003 | 1.8E-11 | 45.2 |
| rs6968380 | G | A | 0.68 | 7 | 114940159 | Intergenic | -0.023 | 0.003 | 1.1E-17 | 73.4 |
| rs112913817 | A | G | 0.01 | 7 | 115077394 | Intergenic | 0.078 | 0.012 | 9.3E-11 | 42.0 |
| rs10233018 | A | G | 0.52 | 7 | 117523709 | Intergenic | 0.025 | 0.003 | 4.8E-22 | 93.2 |
| rs10953957 | G | A | 0.39 | 7 | 121954709 | Intergenic | 0.014 | 0.003 | 3.7E-08 | 30.3 |
| rs77283305 | G | A | 0.31 | 7 | 132593831 | Intron:CHCHD3 | -0.015 | 0.003 | 3.9E-08 | 30.2 |
| rs10279261 | G | A | 0.62 | 7 | 133589846 | Intron:EXOC4 | -0.019 | 0.003 | 6.1E-13 | 51.8 |
| rs1561112 | T | C | 0.41 | 7 | 133840652 | Intron:LRGUK | -0.015 | 0.003 | 3.8E-09 | 34.7 |
| rs2952251 | A | G | 0.74 | 8 | 10143164 | Intron:MSRA | 0.016 | 0.003 | 4.2E-08 | 30.0 |
| rs4326350 | C | G | 0.49 | 8 | 10763655 | Intron:XKR6 | -0.018 | 0.003 | 5.2E-12 | 47.6 |
| rs11780471 | G | A | 0.06 | 8 | 27344719 | Intergenic | -0.039 | 0.005 | 1.6E-13 | 54.5 |
| rs11783093 | C | T | 0.16 | 8 | 27425349 | Intergenic | -0.047 | 0.003 | 2.1E-41 | 182.0 |
| rs1565735 | T | A | 0.20 | 8 | 27426077 | Intergenic | -0.019 | 0.003 | 1.3E-09 | 36.8 |
| rs7836565 | C | T | 0.72 | 8 | 52569449 | Intron:PXDNL | -0.016 | 0.003 | 4.4E-08 | 30.0 |
| rs13261666 | G | T | 0.52 | 8 | 59814666 | Intron:TOX | -0.020 | 0.003 | 4.4E-15 | 61.5 |
| rs3850736 | C | G | 0.47 | 8 | 64912021 | Intron:LOC102724623 | 0.019 | 0.003 | 6.4E-14 | 56.2 |
| rs2063976 | C | T | 0.66 | 8 | 91096366 | Intergenic | -0.020 | 0.003 | 7.5E-14 | 55.9 |
| rs6993429 | C | A | 0.45 | 8 | 92733282 | Intergenic | -0.019 | 0.003 | 9.9E-14 | 55.4 |
| rs6986430 | T | C | 0.22 | 8 | 93048104 | Intron:RUNX1T1 | -0.024 | 0.003 | 2.0E-15 | 63.1 |
| rs9987376 | T | G | 0.57 | 8 | 93190014 | Intergenic | -0.020 | 0.003 | 2.0E-15 | 63.1 |
| rs290601 | C | T | 0.27 | 8 | 115374642 | Intergenic | 0.016 | 0.003 | 1.1E-08 | 32.6 |
| rs3847244 | C | T | 0.47 | 9 | 3025368 | Intergenic | 0.019 | 0.003 | 2.6E-13 | 53.5 |
| rs11791671 | C | T | 0.07 | 9 | 3398679 | Intron:RFX3 | 0.028 | 0.005 | 4.2E-08 | 30.0 |
| rs7024924 | T | C | 0.17 | 9 | 8282399 | Intergenic | 0.019 | 0.003 | 1.9E-08 | 31.6 |
| rs6474609 | T | A | 0.59 | 9 | 10981069 | Intergenic | -0.016 | 0.003 | 1.7E-09 | 36.3 |
| rs1931431 | G | C | 0.48 | 9 | 11161799 | Intergenic | 0.018 | 0.003 | 8.6E-13 | 51.1 |
| rs7867822 | A | G | 0.67 | 9 | 20676454 | Intron:FOCAD | -0.015 | 0.003 | 2.8E-08 | 30.9 |
| rs10966092 | T | C | 0.27 | 9 | 23831658 | Intron:ELAVL2 | -0.020 | 0.003 | 1.1E-12 | 50.6 |
| rs10969352 | T | A | 0.50 | 9 | 29747488 | Intergenic | 0.014 | 0.003 | 1.8E-08 | 31.7 |
| rs4877285 | G | A | 0.67 | 9 | 81354129 | Intergenic | -0.018 | 0.003 | 2.1E-11 | 44.9 |
| rs1930371 | C | T | 0.24 | 9 | 81444104 | Intergenic | -0.017 | 0.003 | 7.1E-09 | 33.5 |
| rs2378662 | G | A | 0.54 | 9 | 86707289 | Intron:LOC101927575 | 0.015 | 0.003 | 2.7E-09 | 35.4 |
| rs1927901 | T | C | 0.55 | 9 | 120519111 | Intergenic | -0.014 | 0.003 | 3.1E-08 | 30.6 |
| rs4837631 | C | T | 0.45 | 9 | 122061948 | Intron:BRINP1 | -0.015 | 0.003 | 2.0E-09 | 35.9 |
| rs1759433 | G | A | 0.48 | 9 | 128073097 | Intron:GAPVD1 | 0.015 | 0.003 | 1.7E-09 | 36.3 |
| rs34553878 | A | G | 0.11 | 9 | 134334588 | Nonsynonymous:PRRC2B | 0.025 | 0.004 | 1.2E-09 | 37.0 |
| rs7026534 | T | G | 0.70 | 9 | 134907263 | Intron:MED27 | -0.017 | 0.003 | 2.7E-09 | 35.4 |
| rs10858334 | C | G | 0.14 | 9 | 137989785 | Utr3:OLFM1 | 0.023 | 0.004 | 1.2E-09 | 37.0 |
| rs10905461 | T | C | 0.75 | 10 | 8803551 | Intergenic | -0.016 | 0.003 | 2.4E-08 | 31.2 |
| rs7920501 | T | A | 0.47 | 10 | 10043159 | Intergenic | -0.016 | 0.003 | 1.3E-09 | 36.9 |
| rs1291821 | A | G | 0.53 | 10 | 11133823 | Intron:CELF2|CELF2-AS2 | 0.014 | 0.003 | 1.4E-08 | 32.2 |
| rs11258417 | C | T | 0.39 | 10 | 13533053 | Intron:BEND7 | -0.015 | 0.003 | 2.7E-08 | 30.9 |
| rs7072776 | A | G | 0.71 | 10 | 22032942 | Intergenic | -0.022 | 0.003 | 5.7E-15 | 61.0 |
| rs2796793 | G | A | 0.45 | 10 | 36634124 | Intergenic | 0.014 | 0.003 | 1.6E-08 | 32.0 |
| rs1733760 | T | C | 0.51 | 10 | 56698174 | Intron:PCDH15 | 0.015 | 0.003 | 6.7E-09 | 33.6 |
| rs7921378 | G | C | 0.48 | 10 | 63674885 | Intron:ARID5B | -0.023 | 0.003 | 6.1E-20 | 83.6 |
| rs7901883 | G | A | 0.23 | 10 | 103186838 | Intron:BTRC | -0.019 | 0.003 | 2.0E-10 | 40.5 |
| rs11594623 | T | C | 0.23 | 10 | 103960351 | Intergenic | 0.027 | 0.003 | 7.5E-20 | 83.2 |
| rs11191269 | C | G | 0.19 | 10 | 104120522 | Intron:GBF1 | 0.018 | 0.003 | 4.6E-08 | 29.9 |
| rs28408682 | A | G | 0.60 | 10 | 104403310 | Intergenic | 0.017 | 0.003 | 1.4E-10 | 41.1 |
| rs12244388 | G | A | 0.35 | 10 | 104640052 | Intron:AS3MT|BORCS7-ASMT | 0.026 | 0.003 | 4.3E-22 | 93.4 |
| rs111842178 | A | G | 0.23 | 10 | 104852121 | Intron:NT5C2 | 0.022 | 0.003 | 2.2E-12 | 49.3 |
| rs34970111 | C | T | 0.46 | 10 | 106078937 | Intron:ITPRIP | -0.015 | 0.003 | 1.3E-08 | 32.4 |
| rs9787523 | T | C | 0.42 | 10 | 106460460 | Intron:SORCS3 | -0.016 | 0.003 | 1.4E-09 | 36.6 |
| rs11192347 | G | A | 0.10 | 10 | 106929313 | Intron:SORCS3 | -0.026 | 0.004 | 6.2E-10 | 38.3 |
| rs10885480 | T | C | 0.28 | 10 | 115378364 | Intron:NRAP | -0.019 | 0.003 | 3.8E-11 | 43.7 |
| rs4752018 | C | A | 0.23 | 10 | 118678712 | Intron:SHTN1 | 0.019 | 0.003 | 4.4E-10 | 38.9 |
| rs9423279 | C | G | 0.65 | 10 | 125680419 | Intergenic | -0.019 | 0.003 | 3.1E-12 | 48.7 |
| rs6265 | C | T | 0.19 | 11 | 27679916 | Nonsynonymous:BDNF | -0.029 | 0.003 | 2.8E-19 | 80.6 |
| rs4275621 | A | G | 0.38 | 11 | 28652996 | Intergenic | -0.021 | 0.003 | 3.8E-16 | 66.4 |
| rs62618693 | C | T | 0.04 | 11 | 32956492 | Nonsynonymous:QSER1 | -0.035 | 0.006 | 2.1E-08 | 31.4 |
| rs2939756 | G | A | 0.48 | 11 | 41436297 | Intron:LRRC4C | -0.016 | 0.003 | 7.5E-10 | 37.9 |
| rs1381775 | T | C | 0.71 | 11 | 42442826 | Intergenic | -0.016 | 0.003 | 2.8E-08 | 30.8 |
| rs2959084 | G | A | 0.70 | 11 | 46078656 | Intron:PHF21A | 0.017 | 0.003 | 9.8E-10 | 37.4 |
| rs3740977 | T | C | 0.17 | 11 | 46393574 | Intron:DGKZ | 0.019 | 0.003 | 1.2E-08 | 32.5 |
| rs61886926 | C | T | 0.38 | 11 | 64133552 | Intron:RPS6KA4 | -0.018 | 0.003 | 7.3E-12 | 46.9 |
| rs61884449 | C | T | 0.15 | 11 | 64485193 | Intron:NRXN2 | 0.020 | 0.004 | 2.3E-08 | 31.2 |
| rs644740 | C | T | 0.46 | 11 | 65561468 | Intron:OVOL1 | -0.014 | 0.003 | 3.7E-08 | 30.3 |
| rs7943721 | G | A | 0.83 | 11 | 73309393 | Intergenic | -0.021 | 0.003 | 3.6E-10 | 39.3 |
| rs7929518 | A | G | 0.77 | 11 | 85980958 | Intron:EED | 0.019 | 0.003 | 2.6E-10 | 40.0 |
| rs586699 | G | A | 0.54 | 11 | 92289734 | Intron:FAT3 | -0.015 | 0.003 | 7.3E-09 | 33.5 |
| rs76460663 | C | G | 0.04 | 11 | 111979741 | Intergenic | -0.042 | 0.006 | 4.2E-11 | 43.5 |
| rs2155646 | T | C | 0.40 | 11 | 112912811 | Intron:NCAM1 | 0.038 | 0.003 | 9.4E-48 | 211.0 |
| rs78239456 | A | T | 0.38 | 11 | 112984491 | Intron:NCAM1 | -0.018 | 0.003 | 9.4E-12 | 46.5 |
| rs1713676 | A | G | 0.52 | 11 | 113660576 | Intergenic | -0.017 | 0.003 | 5.4E-11 | 43.0 |
| rs238896 | G | A | 0.49 | 11 | 113994505 | Intron:ZBTB16 | -0.017 | 0.003 | 3.7E-11 | 43.8 |
| rs540860 | A | G | 0.54 | 11 | 121530888 | Intergenic | 0.018 | 0.003 | 5.8E-12 | 47.4 |
| rs1944689 | G | T | 0.79 | 11 | 121634334 | Intergenic | 0.018 | 0.003 | 1.3E-08 | 32.4 |
| rs1834306 | A | G | 0.58 | 11 | 122023187 | Intron:MIR100HG | -0.014 | 0.003 | 2.0E-08 | 31.5 |
| rs1106363 | C | T | 0.34 | 11 | 131966264 | Intron:NTM | 0.017 | 0.003 | 9.2E-11 | 42.0 |
| rs2010921 | G | A | 0.31 | 11 | 132098205 | Intron:NTM | 0.017 | 0.003 | 2.5E-10 | 40.1 |
| rs11057005 | A | G | 0.44 | 12 | 16748721 | Intron:LMO3 | -0.016 | 0.003 | 9.1E-10 | 37.5 |
| rs13906 | C | T | 0.11 | 12 | 49952394 | Utr3:MCRS1 | -0.025 | 0.004 | 2.0E-09 | 36.0 |
| rs4759229 | A | G | 0.66 | 12 | 56474480 | Intron:ERBB3 | 0.016 | 0.003 | 6.5E-09 | 33.7 |
| rs7969559 | A | G | 0.71 | 12 | 69655167 | Intron:CPSF6 | -0.017 | 0.003 | 1.5E-09 | 36.5 |
| rs7134009 | T | C | 0.29 | 12 | 75263193 | Intergenic | -0.016 | 0.003 | 4.3E-08 | 30.0 |
| rs77215829 | A | C | 0.13 | 12 | 112618346 | Intron:HECTD4 | -0.024 | 0.004 | 2.0E-10 | 40.4 |
| rs1109480 | G | A | 0.38 | 12 | 121083279 | Intron:CABP1 | -0.017 | 0.003 | 1.8E-10 | 40.6 |
| rs11611651 | G | A | 0.09 | 12 | 133380790 | Intron:GOLGA3 | 0.027 | 0.005 | 2.1E-09 | 35.9 |
| rs17197663 | G | A | 0.13 | 13 | 38172867 | Utr5:POSTN | -0.022 | 0.004 | 2.1E-08 | 31.4 |
| rs4264267 | C | T | 0.53 | 13 | 38359676 | Intron:TRPC4 | 0.015 | 0.003 | 6.8E-09 | 33.6 |
| rs61959481 | G | A | 0.21 | 13 | 55834929 | Intergenic | -0.020 | 0.003 | 8.0E-11 | 42.3 |
| rs3098272 | A | C | 0.80 | 13 | 55931424 | Intergenic | -0.018 | 0.003 | 2.1E-08 | 31.4 |
| rs9538162 | T | C | 0.42 | 13 | 59265043 | Intergenic | 0.017 | 0.003 | 1.8E-11 | 45.2 |
| rs1413119 | C | T | 0.40 | 13 | 59339281 | Intergenic | -0.015 | 0.003 | 4.8E-09 | 34.3 |
| rs56367474 | C | T | 0.30 | 13 | 59454139 | Intergenic | -0.017 | 0.003 | 4.2E-10 | 39.0 |
| rs55786907 | A | G | 0.16 | 13 | 59871584 | Intergenic | 0.019 | 0.003 | 1.8E-08 | 31.7 |
| rs4886207 | T | C | 0.64 | 13 | 60705792 | Intron:DIAPH3 | -0.016 | 0.003 | 8.8E-10 | 37.6 |
| rs9540731 | C | T | 0.51 | 13 | 66949370 | Intron:PCDH9 | -0.018 | 0.003 | 3.4E-12 | 48.4 |
| rs9545155 | T | C | 0.48 | 13 | 80191873 | Intergenic | -0.016 | 0.003 | 3.0E-10 | 39.7 |
| rs1772572 | C | A | 0.32 | 13 | 81191176 | Intergenic | -0.017 | 0.003 | 5.6E-10 | 38.4 |
| rs75674569 | G | A | 0.10 | 13 | 96823724 | Intron:HS6ST3 | -0.025 | 0.004 | 2.6E-09 | 35.5 |
| rs7333559 | G | A | 0.78 | 13 | 100546450 | Intron:CLYBL|LOC101927437 | -0.023 | 0.003 | 5.9E-14 | 56.4 |
| rs1108130 | T | A | 0.21 | 13 | 100648356 | Exon:LINC00554 | 0.024 | 0.003 | 1.6E-14 | 59.0 |
| rs12855717 | C | T | 0.54 | 13 | 101252635 | Intergenic | 0.016 | 0.003 | 1.2E-09 | 36.9 |
| rs12878369 | C | A | 0.41 | 14 | 28346502 | Intergenic | 0.017 | 0.003 | 1.6E-11 | 45.4 |
| rs2145451 | T | C | 0.19 | 14 | 29316842 | Intergenic | -0.020 | 0.003 | 5.4E-10 | 38.5 |
| rs9323328 | A | G | 0.54 | 14 | 58653514 | Intergenic | -0.014 | 0.003 | 2.6E-08 | 31.0 |
| rs1811739 | G | A | 0.25 | 14 | 77529375 | Intron:LINC02288 | 0.018 | 0.003 | 6.0E-10 | 38.3 |
| rs8005334 | T | G | 0.36 | 14 | 79563654 | Intron:NRXN3 | 0.017 | 0.003 | 3.4E-10 | 39.4 |
| rs34940743 | A | G | 0.35 | 14 | 80102233 | Intron:NRXN3 | 0.016 | 0.003 | 2.8E-09 | 35.3 |
| rs2925128 | C | T | 0.39 | 14 | 98362355 | Intergenic | 0.017 | 0.003 | 3.7E-10 | 39.3 |
| rs1381287 | C | T | 0.47 | 14 | 98597552 | Intergenic | 0.018 | 0.003 | 1.8E-12 | 49.7 |
| rs55913542 | G | T | 0.18 | 14 | 99693843 | Intron:BCL11B | 0.019 | 0.003 | 3.3E-08 | 30.6 |
| rs1435672 | T | C | 0.56 | 15 | 36399479 | Intergenic | 0.014 | 0.003 | 3.8E-08 | 30.2 |
| rs281296 | G | A | 0.36 | 15 | 47685010 | Intron:SEMA6D | 0.025 | 0.003 | 1.6E-20 | 86.2 |
| rs1435741 | G | A | 0.43 | 15 | 47935843 | Intron:SEMA6D | 0.018 | 0.003 | 1.1E-12 | 50.7 |
| rs56902655 | T | G | 0.14 | 15 | 63898709 | Intergenic | -0.022 | 0.004 | 4.1E-09 | 34.6 |
| rs2289791 | G | T | 0.25 | 15 | 67476952 | Intron:SMAD3 | -0.018 | 0.003 | 2.0E-09 | 36.0 |
| rs60833441 | A | G | 0.46 | 15 | 74048768 | Intergenic | -0.014 | 0.003 | 2.3E-08 | 31.2 |
| rs62007780 | G | T | 0.42 | 15 | 78025464 | Intron:LINGO1 | -0.016 | 0.003 | 7.5E-10 | 37.9 |
| rs12442563 | G | T | 0.22 | 15 | 83893243 | Intergenic | -0.023 | 0.003 | 3.1E-14 | 57.6 |
| rs4310804 | C | G | 0.25 | 15 | 96858409 | Intron:NR2F2-AS1 | -0.018 | 0.003 | 7.6E-10 | 37.9 |
| rs8027457 | T | C | 0.51 | 15 | 99204101 | Intron:IGF1R | 0.015 | 0.003 | 1.9E-09 | 36.1 |
| rs1139897 | G | A | 0.23 | 16 | 720986 | Nonsynonymous:RHOT2 | -0.024 | 0.003 | 1.8E-15 | 63.3 |
| rs11076962 | T | C | 0.28 | 16 | 5811367 | Intergenic | 0.018 | 0.003 | 1.2E-10 | 41.5 |
| rs7192140 | T | C | 0.50 | 16 | 10173748 | Intron:GRIN2A | -0.017 | 0.003 | 3.4E-11 | 43.9 |
| rs9922607 | C | T | 0.20 | 16 | 17570220 | Intergenic | -0.022 | 0.003 | 3.4E-12 | 48.4 |
| rs9941217 | C | G | 0.35 | 16 | 18050926 | Intergenic | -0.019 | 0.003 | 3.5E-12 | 48.4 |
| rs7188873 | A | G | 0.61 | 16 | 24727064 | Intron:TNRC6A | 0.020 | 0.003 | 8.5E-15 | 60.2 |
| rs6497840 | G | A | 0.71 | 16 | 25351633 | Intergenic | 0.023 | 0.003 | 2.0E-15 | 63.1 |
| rs4785187 | G | A | 0.22 | 16 | 49766772 | Intron:ZNF423 | 0.020 | 0.003 | 6.6E-11 | 42.6 |
| rs8050598 | C | T | 0.25 | 16 | 49891964 | Intergenic | 0.019 | 0.003 | 1.8E-10 | 40.7 |
| rs12918191 | A | G | 0.24 | 16 | 50945156 | Intergenic | -0.020 | 0.003 | 3.1E-11 | 44.1 |
| rs9302604 | A | G | 0.44 | 16 | 69576894 | Intergenic | 0.019 | 0.003 | 3.3E-13 | 53.0 |
| rs9936784 | T | G | 0.53 | 16 | 72230694 | Intergenic | 0.014 | 0.003 | 4.3E-08 | 30.0 |
| rs62052916 | A | T | 0.07 | 16 | 72574550 | Intron:LINC01572 | -0.032 | 0.005 | 1.6E-10 | 40.9 |
| rs4788676 | T | C | 0.23 | 16 | 72950468 | Intron:ZFHX3 | -0.018 | 0.003 | 4.9E-09 | 34.2 |
| rs61537885 | T | C | 0.04 | 16 | 75620118 | Intergenic | -0.040 | 0.007 | 8.1E-09 | 33.3 |
| rs117657830 | A | G | 0.04 | 16 | 75766873 | Intergenic | -0.038 | 0.006 | 3.2E-09 | 35.1 |
| rs1050847 | C | T | 0.56 | 16 | 87443734 | Utr3:ZCCHC14 | -0.015 | 0.003 | 7.4E-09 | 33.4 |
| rs11642231 | G | A | 0.37 | 16 | 89608702 | Intron:SPG7 | -0.016 | 0.003 | 3.4E-09 | 34.9 |
| rs4790874 | C | T | 0.53 | 17 | 1995177 | Intron:SMG6 | 0.017 | 0.003 | 8.4E-12 | 46.7 |
| rs11078713 | A | G | 0.42 | 17 | 7795972 | Intron:CHD3 | -0.015 | 0.003 | 1.6E-08 | 31.9 |
| rs28441558 | T | C | 0.06 | 17 | 7803118 | Intron:CHD3 | -0.036 | 0.006 | 1.2E-10 | 41.4 |
| rs11651955 | G | A | 0.50 | 17 | 16235462 | Intergenic | -0.014 | 0.003 | 3.7E-08 | 30.3 |
| rs67777803 | G | T | 0.17 | 17 | 27323322 | Intron:SEZ6 | -0.025 | 0.003 | 3.2E-13 | 53.1 |
| rs2344976 | T | C | 0.61 | 17 | 30685935 | Intron:ZNF207 | -0.015 | 0.003 | 8.0E-09 | 33.3 |
| rs3764351 | G | A | 0.66 | 17 | 37824339 | Intron:PNMT | -0.015 | 0.003 | 3.9E-08 | 30.2 |
| rs72836318 | T | C | 0.25 | 17 | 44121579 | Intron:KANSL1 | -0.017 | 0.003 | 7.0E-09 | 33.5 |
| rs17692129 | C | T | 0.33 | 17 | 44793283 | Intron:NSF | 0.020 | 0.003 | 4.6E-13 | 52.4 |
| rs75919030 | T | C | 0.27 | 17 | 50193197 | Intron:CA10 | -0.021 | 0.003 | 3.4E-13 | 53.0 |
| rs2938134 | C | A | 0.67 | 17 | 50243397 | Intergenic | -0.018 | 0.003 | 3.1E-10 | 39.6 |
| rs2587507 | T | C | 0.50 | 17 | 77790135 | Intergenic | -0.015 | 0.003 | 8.7E-09 | 33.1 |
| rs34342129 | T | C | 0.51 | 18 | 5872472 | Intergenic | -0.014 | 0.003 | 2.1E-08 | 31.4 |
| rs4476253 | G | A | 0.24 | 18 | 25253297 | Intergenic | -0.018 | 0.003 | 5.8E-10 | 38.4 |
| rs7505855 | C | T | 0.59 | 18 | 31696075 | Intron:NOL4 | -0.017 | 0.003 | 5.3E-11 | 43.1 |
| rs8096225 | A | C | 0.70 | 18 | 36921851 | Intron:MIR924HG | 0.016 | 0.003 | 2.6E-08 | 31.0 |
| rs67050670 | A | G | 0.23 | 18 | 39297254 | Intergenic | -0.020 | 0.003 | 2.3E-11 | 44.7 |
| rs2359180 | A | G | 0.37 | 18 | 41314171 | Intergenic | -0.014 | 0.003 | 5.0E-08 | 29.7 |
| rs72898831 | A | G | 0.16 | 18 | 42658643 | Intergenic | -0.024 | 0.004 | 4.1E-12 | 48.1 |
| rs8083764 | G | T | 0.31 | 18 | 49874515 | Intron:DCC | -0.016 | 0.003 | 8.0E-09 | 33.3 |
| rs1373178 | T | G | 0.59 | 18 | 49967811 | Intron:DCC | -0.020 | 0.003 | 4.2E-15 | 61.6 |
| rs62098013 | G | A | 0.37 | 18 | 50863861 | Intron:DCC | 0.018 | 0.003 | 2.2E-11 | 44.8 |
| rs72938304 | G | A | 0.11 | 18 | 53661743 | Intergenic | -0.027 | 0.004 | 1.4E-11 | 45.7 |
| rs11872397 | G | A | 0.25 | 18 | 72535282 | Intron:ZNF407 | -0.017 | 0.003 | 5.2E-09 | 34.1 |
| rs71367544 | C | T | 0.20 | 18 | 77574374 | Intergenic | 0.021 | 0.003 | 8.5E-11 | 42.1 |
| rs76608582 | C | A | 0.05 | 19 | 4474725 | Intron:HDGFL2 | -0.035 | 0.006 | 4.9E-09 | 34.2 |
| rs10853981 | G | A | 0.33 | 19 | 4965064 | Intergenic | 0.015 | 0.003 | 4.9E-08 | 29.8 |
| rs113230003 | G | A | 0.26 | 19 | 18460956 | Intron:PGPEP1 | -0.019 | 0.003 | 1.1E-10 | 41.7 |
| rs8103660 | T | C | 0.35 | 19 | 18566395 | Intron:ELL | 0.016 | 0.003 | 3.0E-09 | 35.2 |
| rs117734003 | G | C | 0.07 | 19 | 51129745 | Intron:SYT3 | 0.030 | 0.005 | 2.6E-09 | 35.5 |
| rs1126757 | C | T | 0.47 | 19 | 55879872 | Synonymous:IL11 | 0.014 | 0.003 | 2.9E-08 | 30.8 |
| rs6050446 | A | G | 0.97 | 20 | 25195509 | Nonsynonymous:ENTPD6 | 0.054 | 0.008 | 8.8E-13 | 51.1 |
| rs6058782 | C | T | 0.91 | 20 | 29946968 | Intergenic | 0.030 | 0.004 | 1.8E-11 | 45.2 |
| rs1555445 | A | T | 0.32 | 20 | 31175258 | Upstream:NOL4L-DT | 0.019 | 0.003 | 7.8E-12 | 46.8 |
| rs6073075 | T | A | 0.82 | 20 | 42015801 | Intergenic | -0.019 | 0.003 | 2.4E-08 | 31.1 |
| rs910912 | T | C | 0.74 | 20 | 54462393 | Intergenic | -0.017 | 0.003 | 7.8E-09 | 33.3 |
| rs6011779 | C | T | 0.81 | 20 | 61984317 | Intron:CHRNA4 | -0.019 | 0.003 | 2.8E-09 | 35.3 |
| rs3810496 | T | C | 0.62 | 20 | 62406886 | Intron:ZBTB46 | 0.016 | 0.003 | 1.5E-09 | 36.5 |
| rs4818005 | G | A | 0.58 | 21 | 40588819 | Intron:BRWD1 | -0.020 | 0.003 | 1.1E-14 | 59.7 |
| rs139896 | T | C | 0.65 | 22 | 38397797 | Intron:POLR2F | 0.015 | 0.003 | 7.1E-09 | 33.5 |
| rs4822102 | C | T | 0.62 | 22 | 42698430 | Intergenic | -0.017 | 0.003 | 2.8E-10 | 39.8 |
| rs9627272 | G | C | 0.41 | 22 | 46442288 | Intergenic | -0.015 | 0.003 | 2.4E-09 | 35.6 |

Chr, chromosome; EA, effect allele; EAF, effect allele frequency; NA, non-effect allele; SE, standard error; SNP, single nucleotide polymorphism.

*The beta coefficients represent the change in the probability of being an individual had ever smoked regularly for each additional effect allele.

# Supplementary Table 2. Characteristics of the genetic variants associated with lifetime smoking index

| **SNP** | **EA** | **NA** | **EAF** | **Chr** | **Position** | **Gene** | **Beta*** | **Se** | **P-value** | **F** |
| --- | --- | --- | --- | --- | --- | --- | --- | --- | --- | --- |
| rs1193237 | G | C | 0.44 | 1 | 7526486 | Intron:CAMTA1 | -0.011 | 0.002 | 2.80E-08 | 30.3 |
| rs4949465 | T | C | 0.87 | 1 | 32178489 | Intergenic | -0.017 | 0.003 | 1.70E-08 | 32.1 |
| rs549845 | G | A | 0.30 | 1 | 44076469 | Intron:PTPRF | 0.016 | 0.002 | 8.30E-14 | 64.0 |
| rs1933270 | T | G | 0.36 | 1 | 49977965 | Intron:AGBL4 | 0.013 | 0.002 | 1.50E-10 | 42.3 |
| rs7528604 | G | A | 0.57 | 1 | 66407352 | Intron:PDE4B | 0.014 | 0.002 | 5.70E-12 | 49.0 |
| rs11210229 | A | G | 0.38 | 1 | 73860028 | Intergenic | 0.017 | 0.002 | 2.00E-16 | 72.3 |
| rs7553348 | G | A | 0.44 | 1 | 75005067 | Intron:FPGT-TNNI3K | 0.014 | 0.002 | 5.20E-12 | 49.0 |
| rs10922907 | A | T | 0.45 | 1 | 91193049 | Intergenic | 0.015 | 0.002 | 3.00E-13 | 56.3 |
| rs1931263 | G | T | 0.51 | 1 | 96175101 | Intron:RP11-286B14.1 | -0.011 | 0.002 | 4.00E-08 | 30.3 |
| rs7519626 | C | T | 0.32 | 1 | 99514554 | Intron:RP5-896L10.1 | 0.012 | 0.002 | 1.20E-08 | 36.0 |
| rs9435340 | T | A | 0.34 | 1 | 107593201 | Intergenic | 0.012 | 0.002 | 1.20E-08 | 36.0 |
| rs10918701 | G | A | 0.37 | 1 | 162090536 | Intron:NOS1AP | 0.012 | 0.002 | 2.10E-08 | 36.0 |
| rs2867112 | T | G | 0.84 | 2 | 651349 | Intergenic | 0.021 | 0.003 | 4.80E-15 | 49.0 |
| rs6741228 | T | C | 0.43 | 2 | 22548774 | Intron:LINC01830 | 0.011 | 0.002 | 1.60E-08 | 30.3 |
| rs62135536 | C | T | 0.97 | 2 | 44326028 | Intergenic | 0.035 | 0.006 | 8.00E-10 | 34.0 |
| rs7569203 | A | C | 0.69 | 2 | 45154418 | Intron:LINC01833 | -0.016 | 0.002 | 7.40E-13 | 64.0 |
| rs13016665 | C | A | 0.58 | 2 | 57995348 | Intergenic | -0.012 | 0.002 | 1.80E-09 | 36.0 |
| rs4671357 | T | C | 0.52 | 2 | 60136176 | Intron:RP11-444A22.1 | -0.014 | 0.002 | 1.10E-11 | 49.0 |
| rs359243 | T | C | 0.39 | 2 | 60475509 | Intergenic | -0.013 | 0.002 | 9.50E-10 | 42.3 |
| rs2678670 | A | T | 0.49 | 2 | 104469564 | Intergenic | 0.013 | 0.002 | 3.10E-10 | 42.3 |
| rs62155874 | A | G | 0.87 | 2 | 105973094 | Intergenic | -0.024 | 0.003 | 5.20E-16 | 64.0 |
| rs3811038 | T | C | 0.72 | 2 | 113240183 | Intron:TTL | -0.014 | 0.002 | 8.90E-10 | 49.0 |
| rs2890772 | G | T | 0.41 | 2 | 146175106 | Intergenic | -0.02 | 0.002 | 2.10E-22 | 100.0 |
| rs62175972 | T | C | 0.97 | 2 | 161362830 | Intergenic | 0.031 | 0.006 | 1.70E-08 | 26.7 |
| rs3769949 | T | A | 0.53 | 2 | 166199284 | Intron:SCN2A | -0.012 | 0.002 | 2.50E-09 | 36.0 |
| rs13009008 | A | G | 0.33 | 2 | 174043233 | Intron:MAP3K20 | 0.012 | 0.002 | 4.60E-09 | 36.0 |
| rs4473348 | A | T | 0.25 | 2 | 182073742 | Intron:LINC01934 | -0.015 | 0.002 | 6.40E-11 | 56.3 |
| rs12623702 | A | G | 0.61 | 2 | 202885506 | Intergenic | -0.014 | 0.002 | 7.70E-12 | 49.0 |
| rs6779302 | G | T | 0.63 | 3 | 16859710 | Intron:PLCL2 | -0.013 | 0.002 | 1.20E-09 | 42.3 |
| rs6778080 | T | C | 0.27 | 3 | 49317338 | Intron:USP4 | 0.016 | 0.002 | 1.30E-12 | 64.0 |
| rs775758 | A | T | 0.43 | 3 | 77582005 | Intron:ROBO2 | 0.012 | 0.002 | 1.10E-08 | 36.0 |
| rs421983 | T | C | 0.52 | 3 | 84892866 | Intron:LINC00971 | 0.013 | 0.002 | 3.30E-10 | 42.3 |
| rs326341 | G | A | 0.53 | 3 | 107811142 | Intergenic | 0.014 | 0.002 | 1.20E-11 | 49.0 |
| rs73220544 | A | C | 0.84 | 3 | 131074511 | Intron:RP11-933H2.4 | -0.016 | 0.003 | 1.50E-08 | 28.4 |
| rs9842947 | C | T | 0.33 | 3 | 157412246 | Intergenic | -0.013 | 0.002 | 3.10E-09 | 42.3 |
| rs624833 | T | G | 0.70 | 4 | 2881256 | Intron:ADD1 | 0.013 | 0.002 | 6.60E-10 | 42.3 |
| rs61796681 | A | T | 0.91 | 4 | 23678196 | Intron:RP11-380P13.1 | -0.019 | 0.004 | 4.20E-08 | 22.6 |
| rs317021 | T | A | 0.81 | 4 | 35418368 | Intergenic | -0.017 | 0.003 | 1.10E-10 | 32.1 |
| rs72678864 | G | A | 0.83 | 4 | 112422145 | Intergenic | 0.018 | 0.003 | 1.60E-11 | 36.0 |
| rs17576594 | G | A | 0.72 | 4 | 147952241 | Intergenic | 0.016 | 0.002 | 1.70E-12 | 64.0 |
| rs11948770 | T | C | 0.77 | 5 | 13246336 | Intergenic | -0.015 | 0.002 | 4.90E-10 | 56.3 |
| rs71627581 | G | A | 0.89 | 5 | 43161351 | Intergenic | 0.019 | 0.003 | 1.60E-09 | 40.1 |
| rs10052591 | T | C | 0.57 | 5 | 50812738 | Intergenic | 0.012 | 0.002 | 2.10E-09 | 36.0 |
| rs2080870 | A | T | 0.26 | 5 | 60388313 | Intron:NDUFAF2 | 0.012 | 0.002 | 4.90E-08 | 36.0 |
| rs4571506 | C | T | 0.54 | 5 | 87756918 | Intron:CTC-498M16.4 | 0.011 | 0.002 | 1.50E-08 | 30.3 |
| rs4957528 | A | C | 0.21 | 5 | 106420589 | Intergenic | -0.015 | 0.002 | 4.20E-09 | 56.3 |
| rs329120 | C | T | 0.58 | 5 | 133861756 | Intron:JADE2 | 0.014 | 0.002 | 6.30E-12 | 49.0 |
| rs986391 | G | A | 0.37 | 5 | 166993972 | Intron:TENM2 | 0.016 | 0.002 | 9.40E-15 | 64.0 |
| rs13153393 | A | G | 0.88 | 5 | 167604213 | Intron:TENM2 | -0.02 | 0.003 | 2.50E-10 | 44.4 |
| rs245774 | A | G | 0.27 | 5 | 170530930 | Intron:RANBP17 | -0.013 | 0.002 | 7.40E-09 | 42.3 |
| rs6935954 | A | G | 0.42 | 6 | 26255451 | Intergenic | 0.014 | 0.002 | 8.20E-12 | 49.0 |
| rs2254710 | C | A | 0.24 | 6 | 37477000 | Intron:RP1-153P14.8 | 0.013 | 0.002 | 3.50E-08 | 42.3 |
| rs2894808 | T | A | 0.92 | 6 | 52861990 | Intergenic | -0.022 | 0.004 | 3.50E-09 | 30.3 |
| rs12202536 | A | G | 0.51 | 6 | 67475273 | Intergenic | -0.012 | 0.002 | 2.80E-09 | 36.0 |
| rs7766610 | C | A | 0.18 | 6 | 111707821 | Intron:REV3L | 0.018 | 0.003 | 2.20E-12 | 36.0 |
| rs1922018 | C | T | 0.36 | 7 | 3560401 | Intron:SDK1 | 0.014 | 0.002 | 3.00E-12 | 49.0 |
| rs10226228 | A | G | 0.63 | 7 | 32315613 | Intron:PDE1C | -0.016 | 0.002 | 2.00E-15 | 64.0 |
| rs11768481 | C | A | 0.67 | 7 | 96629103 | Intron:DLX6-AS1 | 0.013 | 0.002 | 9.90E-10 | 42.3 |
| rs6962772 | A | G | 0.85 | 7 | 99081730 | Intergenic | 0.016 | 0.003 | 7.80E-09 | 28.4 |
| rs10282292 | C | T | 0.36 | 7 | 111092478 | Intron:IMMP2L | 0.013 | 0.002 | 5.90E-10 | 42.3 |
| rs2401924 | G | C | 0.50 | 7 | 115057862 | Intergenic | 0.015 | 0.002 | 2.70E-14 | 56.3 |
| rs7807019 | A | G | 0.54 | 7 | 117543063 | Intergenic | -0.015 | 0.002 | 6.70E-14 | 56.3 |
| rs6957896 | C | T | 0.50 | 7 | 132309592 | Intron:PLXNA4 | -0.011 | 0.002 | 4.50E-08 | 30.3 |
| rs4731925 | C | T | 0.32 | 7 | 132664757 | Intron:CHCHD3 | -0.012 | 0.002 | 2.60E-08 | 36.0 |
| rs35169606 | T | G | 0.61 | 8 | 9604066 | Intron:TNKS | 0.013 | 0.002 | 1.20E-09 | 42.3 |
| rs11783093 | C | T | 0.84 | 8 | 27425349 | Intron:GULOP | 0.023 | 0.003 | 1.20E-16 | 58.8 |
| rs2062882 | G | A | 0.59 | 8 | 91839576 | Intron:NECAB1 | -0.012 | 0.002 | 1.10E-08 | 36.0 |
| rs72674867 | A | T | 0.77 | 8 | 95578201 | Intron:RP11-267M23.4 | 0.013 | 0.002 | 3.80E-08 | 42.3 |
| rs4543592 | T | C | 0.52 | 9 | 3014254 | Intron:CARM1P1 | -0.012 | 0.002 | 4.50E-10 | 36.0 |
| rs7039819 | G | A | 0.43 | 9 | 82430418 | Intergenic | 0.013 | 0.002 | 5.10E-10 | 42.3 |
| rs1246265 | T | C | 0.31 | 9 | 86761745 | Intergenic | -0.013 | 0.002 | 4.20E-09 | 42.3 |
| rs1221148 | C | G | 0.59 | 9 | 122046875 | Intron:BRINP1 | 0.013 | 0.002 | 7.30E-11 | 42.3 |
| rs13296519 | G | T | 0.61 | 9 | 128471924 | Intergenic | -0.014 | 0.002 | 8.10E-12 | 49.0 |
| rs113382419 | C | A | 0.89 | 9 | 136463019 | Intergenic | -0.041 | 0.003 | 3.00E-37 | 186.8 |
| rs11255908 | T | G | 0.74 | 10 | 8802912 | Intergenic | -0.015 | 0.002 | 2.30E-10 | 56.3 |
| rs2675638 | G | A | 0.58 | 10 | 63576286 | Intron:RP11-491H19.1 | 0.012 | 0.002 | 1.30E-09 | 36.0 |
| rs10823968 | A | T | 0.63 | 10 | 74738269 | Intergenic | 0.012 | 0.002 | 2.10E-08 | 36.0 |
| rs17553262 | A | C | 0.89 | 10 | 92912773 | Intergenic | -0.018 | 0.003 | 5.30E-09 | 36.0 |
| rs7077678 | C | T | 0.62 | 10 | 104438565 | Intron:ARL3 | 0.012 | 0.002 | 2.60E-09 | 36.0 |
| rs12244388 | G | A | 0.66 | 10 | 104640052 | Intron:AS3MT | -0.019 | 0.002 | 1.40E-19 | 90.3 |
| rs3896224 | A | G | 0.59 | 10 | 106467853 | Intron:SORCS3 | 0.014 | 0.002 | 1.10E-11 | 49.0 |
| rs34866095 | A | G | 0.69 | 11 | 16377356 | Intron:SOX6 | -0.012 | 0.002 | 1.20E-08 | 36.0 |
| rs75742406 | G | A | 0.74 | 11 | 17070365 | Intron:OR7E14P | 0.014 | 0.002 | 1.30E-09 | 49.0 |
| rs17309874 | G | A | 0.74 | 11 | 27667236 | Intron:BDNF-AS | -0.016 | 0.002 | 9.70E-13 | 64.0 |
| rs4391802 | A | G | 0.71 | 11 | 28674592 | Intergenic | 0.015 | 0.002 | 1.40E-11 | 56.3 |
| rs112282219 | G | A | 0.96 | 11 | 46632809 | Intron:HARBI1 | -0.033 | 0.005 | 3.80E-11 | 43.6 |
| rs9919670 | G | A | 0.61 | 11 | 112877304 | Intron:NCAM1 | -0.022 | 0.002 | 7.60E-27 | 121.0 |
| rs74086911 | G | A | 0.93 | 12 | 50015942 | Intron:PRPF40B | 0.021 | 0.004 | 2.10E-08 | 27.6 |
| rs7297175 | T | C | 0.43 | 12 | 56473808 | Utr5:ERBB3 | -0.012 | 0.002 | 6.60E-09 | 36.0 |
| rs10879871 | T | G | 0.34 | 12 | 75380511 | Intergenic | -0.014 | 0.002 | 5.00E-11 | 49.0 |
| rs12831617 | C | T | 0.76 | 12 | 84758368 | Intergenic | -0.013 | 0.002 | 1.90E-08 | 42.3 |
| rs6562474 | C | G | 0.65 | 13 | 67332812 | Intron:PCDH9 | 0.012 | 0.002 | 1.00E-08 | 36.0 |
| rs7333559 | G | A | 0.21 | 13 | 100546450 | Utr3:CLYBL | 0.015 | 0.002 | 3.20E-10 | 56.3 |
| rs860326 | C | T | 0.43 | 14 | 57342912 | Intron:OTX2-AS1 | 0.012 | 0.002 | 2.70E-09 | 36.0 |
| rs7155595 | A | C | 0.67 | 14 | 77502546 | Intergenic | -0.013 | 0.002 | 2.50E-09 | 42.3 |
| rs3742365 | T | C | 0.60 | 14 | 104198251 | Intron:ZFYVE21 | -0.016 | 0.002 | 2.50E-14 | 64.0 |
| rs35175834 | G | A | 0.79 | 15 | 47680815 | Intron:SEMA6D | -0.024 | 0.002 | 4.60E-22 | 144.0 |
| rs28485305 | C | T | 0.63 | 15 | 74044197 | Intron:C15orf59 | 0.012 | 0.002 | 2.60E-08 | 36.0 |
| rs8042849 | C | T | 0.34 | 15 | 78817929 | Intron:HYKK | 0.028 | 0.002 | 1.80E-39 | 196.0 |
| rs8042134 | T | G | 0.54 | 15 | 97514404 | Intergenic | -0.014 | 0.002 | 1.30E-12 | 49.0 |
| rs6598539 | T | C | 0.49 | 15 | 99204483 | Intron:IGF1R | -0.012 | 0.002 | 4.50E-09 | 36.0 |
| rs11861214 | G | T | 0.78 | 16 | 746611 | Intron:FBXL16 | 0.014 | 0.002 | 2.00E-08 | 49.0 |
| rs12708665 | A | G | 0.29 | 16 | 24728227 | Intron:TNRC6A | -0.013 | 0.002 | 3.50E-09 | 42.3 |
| rs57611503 | G | A | 0.49 | 16 | 31165795 | Intergenic | 0.011 | 0.002 | 4.00E-08 | 30.3 |
| rs889398 | C | T | 0.59 | 16 | 69556715 | Intergenic | 0.013 | 0.002 | 6.30E-11 | 42.3 |
| rs60952428 | T | C | 0.91 | 16 | 75640521 | Intron:ADAT1 | 0.019 | 0.003 | 3.00E-08 | 40.1 |
| rs1050847 | C | T | 0.43 | 16 | 87443734 | Utr3:ZCCHC14 | 0.011 | 0.002 | 1.40E-08 | 30.3 |
| rs369230 | G | T | 0.31 | 16 | 89645437 | Intron:CPNE7 | -0.013 | 0.002 | 1.80E-09 | 42.3 |
| rs8614 | C | A | 0.82 | 17 | 27588806 | Utr3:NUFIP2 | -0.017 | 0.003 | 1.80E-10 | 32.1 |
| rs732083 | G | A | 0.33 | 17 | 37834367 | Intron:PGAP3 | 0.012 | 0.002 | 1.50E-08 | 36.0 |
| rs9904288 | T | C | 0.71 | 17 | 47031973 | Intergenic | 0.012 | 0.002 | 3.10E-08 | 36.0 |
| rs67596067 | G | A | 0.65 | 17 | 50333733 | Intergenic | -0.013 | 0.002 | 1.20E-09 | 42.3 |
| rs12967855 | A | G | 0.33 | 18 | 35138245 | Intron:CELF4 | 0.012 | 0.002 | 3.10E-08 | 36.0 |
| rs62098013 | G | A | 0.64 | 18 | 50863861 | Intron:DCC | -0.012 | 0.002 | 4.10E-09 | 36.0 |
| rs71367545 | G | A | 0.79 | 18 | 77576337 | Intergenic | -0.015 | 0.002 | 1.40E-09 | 56.3 |
| rs76608582 | C | A | 0.95 | 19 | 4474725 | Intron:CTB-50L17.10 | 0.031 | 0.005 | 3.20E-10 | 38.4 |
| rs35343344 | C | A | 0.73 | 19 | 18471610 | Intron:PGPEP1 | 0.013 | 0.002 | 8.80E-09 | 42.3 |
| rs4814873 | C | T | 0.77 | 20 | 19616429 | Intron:SLC24A3 | 0.014 | 0.002 | 2.90E-09 | 49.0 |
| rs6119897 | G | A | 0.76 | 20 | 31145415 | Intron:NOL4L | -0.018 | 0.002 | 3.60E-15 | 81.0 |
| rs12481282 | G | C | 0.72 | 20 | 44761377 | Intergenic | -0.013 | 0.002 | 7.80E-09 | 42.3 |
| rs348809 | A | G | 0.35 | 20 | 59032097 | Intron:MIR646HG | -0.012 | 0.002 | 1.30E-08 | 36.0 |
| rs6011779 | C | T | 0.19 | 20 | 61984317 | Intron:CHRNA4 | 0.028 | 0.003 | 2.30E-27 | 87.1 |
| rs147412694 | G | A | 0.85 | 21 | 40702786 | Intergenic | -0.017 | 0.003 | 2.90E-09 | 32.1 |
| rs2838834 | C | T | 0.70 | 21 | 46665208 | Intron:LINC00334 | -0.013 | 0.002 | 6.30E-10 | 42.3 |
| rs136233 | A | G | 0.81 | 22 | 31212410 | Intron:OSBP2 | -0.014 | 0.003 | 1.80E-08 | 21.8 |
| rs202645 | A | G | 0.20 | 22 | 41798520 | Intergenic | -0.015 | 0.002 | 3.90E-09 | 56.3 |

Chr, chromosome; EA, effect allele; EAF, effect allele frequency; NA, non-effect allele; SE, standard error; SNP, single nucleotide polymorphism.

*The beta coefficients represent the change in lifetime smoking index for each additional effect allele.

# Supplementary Table 3. Mendelian randomization associations of genetically predicted smoking with overall, ER-positive, and ER-negative breast cancer

| Risk factors | Methods | Overall breast cancer | | ER-positive cancer | | ER-negative cancer | |
| --- | --- | --- | --- | --- | --- | --- | --- |
| OR (95% CI) | *P*-value | OR (95% CI) | *P*-value | OR (95% CI) | *P*-value |
| Smoking initiation | IVW | 1.05 (1.01-1.09) | 0.02 | 1.05 (1.01-1.10) | 0.03 | 1.04 (0.98-1.12) | 0.21 |
|  | MVMR* | 1.05 (0.98-1.14) | 0.08 | 1.05 (0.97-1.15) | 0.13 | 1.09 (0.97-1.22) | 0.15 |
|  | Maximum likelihood | 1.05 (1.01-1.09) | 0.02 | 1.05 (1.00-1.10) | 0.03 | 1.05 (0.98-1.12) | 0.21 |
|  | Weighted median | 1.07 (1.01-1.14) | 0.02 | 1.02 (0.95-1.10) | 0.34 | 1.08 (0.97-1.20) | 0.17 |
|  | MR-PRESSO | 1.05 (1.00-1.11) | 0.03 | 1.03 (0.97-1.09) | 0.19 | 1.06 (0.97-1.15) | 0.19 |
|  | MR-Egger† | / | 0.88 | / | 0.65 | / | 0.26 |
|  |  |  |  |  |  |  |  |
| Lifetime smoking index | IVW | 1.13 (1.04-1.22) | 5.6×10-3 | 1.11 (1.00-1.22) | 0.04 | 1.15 (0.98-1.34) | 0.08 |
|  | MVMR* | 1.17 (1.02-1.34) | 0.02 | 1.18 (1.01-1.38) | 0.03 | 1.17 (0.95-1.46) | 0.14 |
|  | Maximum likelihood | 1.13 (1.04-1.23) | 5.8×10-3 | 1.11 (1.00-1.23) | 0.04 | 1.15 (0.99-1.34) | 0.08 |
|  | Weighted median | 1.16 (1.02-1.33) | 0.02 | 1.11 (0.95-1.31) | 0.20 | 1.21 (0.95-1.54) | 0.12 |
|  | MR-PRESSO | 1.15 (1.03-1.28) | 0.01 | 1.08 (0.96-1.23) | 0.21 | 1.20 (1.01-1.42) | 0.04 |
|  | MR-Egger† | / | 0.30 | / | 0.11 | / | 0.17 |

CI, confidence interval; ER, estrogen receptor; IVW, the inverse-variance weighted method; MR-PRESSO, MR-Pleiotropy Residual Sum and Outlier; MVMR, multivariable Mendelian randomization; OR, odds ratio;

*Adjusted for alcohol.

†*P*-value of the intercept from the MR-Egger regression analysis
